# Supplementary material
Source: publisher figshare collection journal article supplement (https://frontiersin.figshare.com/ndownloader/files/32418956)
Supplement: Supplementary file 1 [file 32418956]

## Sheet: Sheet1
Beluga ID	Tag PTT	Primary tag type	First data date	Last data date*	Data duration (days)	General	GPS										Data to Transmit						When to Transmit
						Repetition interval (sec)	Time between Fast-GPS measurements (min)	Max no. Fast-GPSs per hour	Max no. Fast-GPSs per day	Max no. failed Fast-GPSs per hour	Max no. failed Fast-GPSs per day	Retry a failed Fast-GPS immediately	Take extra Fast-GPS measurements after a dive	Fast-GPS days		Fast-GPS hours	Hist	Standard	Time-series	Transmission priority			Transmit hours	Jan		Feb		Mar		Apr		May		Jun		Jul		Aug		Sep		Oct		Nov		Dec		Accumulate	Optimize for battery life
														Every day	Every 7th day					Hist & ST	Location	Behaviour & TS		Daily allowance	Days	Daily allowance	Days	Daily allowance	Days	Daily allowance	Days	Daily allowance	Days	Daily allowance	Days	Daily allowance	Days	Daily allowance	Days	Daily allowance	Days	Daily allowance	Days	Daily allowance	Days	Daily allowance	Days
LC2018#1	174965	SPLASH10-F-238	2018-07-03	2019-01-02	184	25	7	10	Unlimited	10	Unlimited	Yes	No	Jul-Sep	Oct-Jun	00-23	TAD	None	Depth, Temp	High	High	High	00-23	400	All	400	All	400	All	400	All	400	All	500	All	1040	All	940	All	840	All	740	All	500	All	450	All	Yes	Yes
LC2018#2	174967	SPLASH10-F-238	2018-07-06	2019-06-19	349	25	15	5	Unlimited	4	Unlimited	Yes	No	Jul-Sep	Oct-Jun	00-23	TAD	None	Depth, Temp	High	High	High	00-23	250	All	250	All	250	All	250	All	250	All	500	All	600	All	550	All	500	All	450	All	250	All	250	All	Yes	Yes
LC2018#3	174962	SPLASH10-F-238	2018-07-08	2018-12-15	161	25	15	5	Unlimited	4	Unlimited	Yes	No	Jul-Sep	Oct-Jun	00-23	TAD	None	Depth, Temp	High	High	High	00-23	250	All	250	All	250	All	250	All	250	All	250	All	500	All	500	All	500	All	500	All	300	All	250	All	Yes	Yes
LC2018#4	174963	SPLASH10-F-238	2018-07-08	2019-06-07	335	25	15	5	Unlimited	4	Unlimited	No	No	Jul-Oct	Nov-Jun	00-23	TAD	None	Depth, Temp	High	High	High	00-23	250	All	250	All	250	All	250	All	250	All	250	All	500	All	500	All	500	All	500	All	300	All	250	All	Yes	Yes
LC2018#6	174966	SPLASH10-F-238	2018-07-08	2019-06-29	357	25	15	5	Unlimited	4	Unlimited	No	No	Jul-Oct	Nov-Jun	00-23	TAD	None	Depth, Temp	High	High	High	00-23	250	All	250	All	250	All	250	All	250	All	250	All	500	All	500	All	500	All	500	All	300	All	250	All	Yes	Yes
LC2018#8	174969	SPLASH10-F-238	2018-07-12	2018-12-19	161	25	30	3	Unlimited	3	Unlimited	No	No	Jul-Sep	Oct-Jun	00-23	TAD	None	Depth, Temp	High	High	High	00-23	175	All	150	All	150	All	150	All	150	All	150	All	400	All	400	All	400	All	200	All	200	All	175	All	Yes	Yes
LC2019#2	174972	SPLASH10-F-238	2019-06-29	2019-11-15	140	25	15	4	Unlimited	8	Unlimited	Yes	No	Jul-Sep	Oct-Jun	00-23	TAD	Light-level locations	Depth, Temp	Low	High	High	00-23	300	All	300	All	300	All	300	All	300	All	900	All	900	All	900	All	900	All	300	All	300	All	300	All	Yes	Yes
LC2019#3	174964	SPLASH10-F-238	2019-06-30	2019-08-03	35	25	15	4	Unlimited	8	Unlimited	Yes	No	Jul-Sep	Oct-Jun	00-23	TAD	Light-level locations	Depth, Temp	Low	High	High	00-23	300	All	300	All	300	All	300	All	300	All	900	All	900	All	900	All	900	All	300	All	300	All	300	All	Yes	Yes
LC2019#6	174976	SPLASH10-F-238	2019-07-03	2019-08-21	50	25	15	4	Unlimited	4	Unlimited	Yes	No	Jun-Sep	Oct-May	00-23	No	Light-level locations	Depth	NA	High	High	00-02, 04, 06, 08, 10, 12,14, 16, 18-20, 22, 23	250	All	250	All	250	All	250	All	250	All	500	All	500	All	500	All	500	All	250	All	250	All	250	All	Yes	Yes
LC2019#14	179901	SPLASH10-F-321	2019-07-10	2019-09-16	69	24	15	4	Unlimited	4	Unlimited	No	No	Jan-Dec	NA	00-23	TAD	All except dive-depth-temperature profiles	Depth	Low	High	High	00-23	250	All	250	All	250	All	250	All	250	All	250	All	500	All	500	All	500	All	250	All	250	All	250	All	Yes	Yes
RD2019#18	179902	SPLASH10-F-321	2019-07-13	2019-08-11	30	25	15	4	Unlimited	4	Unlimited	No	2 GPS, 1 min between	Jan-Dec	NA	00-23	TAD	All except dive-depth-temperature profiles	Depth, Temp	Low	High	High	00-23	500	All	500	All	500	All	500	All	500	All	500	All	1000	All	1000	All	1000	All	500	All	500	All	500	All	Yes	Yes
RD2019#19	179904	SPLASH10-F-321	2019-07-13	2019-07-28	16	27	15	4	Unlimited	4	Unlimited	No	2 GPS, 1 min between	Jan-Dec	NA	00-23	TAD	All except dive-depth-temperature profiles	Depth, Temp	Low	High	High	00-23	500	All	500	All	500	All	500	All	500	All	500	All	1000	All	1000	All	1000	All	500	All	500	All	500	All	Yes	Yes
RD2019#20	179899	SPLASH10-F-321	2019-07-13	2019-07-25	13	22	15	4	Unlimited	4	Unlimited	No	2 GPS, 1 min between	Jan-Dec	NA	00-23	TAD	All except dive-depth-temperature profiles	Depth, Temp	Low	High	High	00-23	500	All	500	All	500	All	500	All	500	All	500	All	1000	All	1000	All	1000	All	500	All	500	All	500	All	Yes	Yes
*For remote-deployed and secondary tags the "Last data date" represents the last date the tag was attached to an animal. These tags floated on the surface and continued to transmit archived data and Argos locations for a number of days after release from an animal
Beluga ID	Tag PTT	Secondary tag type	First data date	Last data date	Data duration (days)	Number of (unique) hourly depth time-series messages received	Proportion completeness depth time-series data (%)
LC2018#1	174957	MiniPAT	2018-07-03	18/08/2018*	46	522	46.5
LC2018#4	174955	MiniPAT	2018-07-08	30/07/2018*	22	427	78.3
LC2018#6	174956	MiniPAT	2018-07-08	24/07/2018*	16	354	90.7
[truncated: 4 more columns]
